# Supplementary material for: Research progress regarding long-chain non-coding RNA in lung cancer: a narrative review
Source: PubMed Central journal article supplement — J Thorac Dis. 2022 Aug;14(8):3016–29. doi: 10.21037/jtd-22-897 (PMC9442518; doi:10.21037/jtd-22-897), 2022-08
Supplement: jtd-14-08-3016-rc.pdf [file jtd-14-08-3016-rc.pdf]

## Narrative Review Checklist

| Section/Topic             | Item No | Item                                                                                                                                                                               | Reported on Page Number/Line Number | Reported on Section/Paragraph |
|---------------------------|---------|------------------------------------------------------------------------------------------------------------------------------------------------------------------------------------|-------------------------------------|-------------------------------|
| <b>TITLE</b>              |         |                                                                                                                                                                                    |                                     |                               |
| Title                     | 1       | Identify the report as a Narrative Review or Literature Review.                                                                                                                    | 1/2-3                               | Title                         |
| <b>ABSTRACT</b>           |         |                                                                                                                                                                                    |                                     |                               |
| Structured summary        | 2       | Provide a structured summary with the subsections as: Background and Objective, Methods, Key Content and Findings, Conclusions.                                                    | 1-2/31-53                           | Abstract/1-4                  |
| <b>INTRODUCTION</b>       |         |                                                                                                                                                                                    |                                     |                               |
| Rationale/background      | 3       | Describe the rationale for the review in the context of what is already known.                                                                                                     | 2-5/58-131                          | Introduction/1-5              |
| Objectives                | 4       | Specify the key question(s) identified for the review topic.                                                                                                                       | 3/69-74                             | Introduction/2                |
| <b>METHODS</b>            |         |                                                                                                                                                                                    |                                     |                               |
| Research selection        | 5       | Specify the process for identifying the literature search (eg, years considered, language, publication status, study design, and databases of coverage).                           | 5/134-141                           | Methods                       |
| <b>DISCUSSION/SUMMARY</b> |         |                                                                                                                                                                                    |                                     |                               |
| Narrative                 | 6       | Discuss: 1) research reviewed including fundamental or key findings, 2) limitations and/or quality of research reviewed, and 3) need for future research.                          | 5-14/144-428                        | Discussion/1-24               |
| Summary                   | 7       | Provide an overall interpretation of the narrative review in the context of clinical practice for health professionals, policy development and implementation, or future research. | 14/430-442                          | Conclusion                    |

Article information: <https://dx.doi.org/10.21037/jtd-22-897>

\*As the checklist was provided upon initial submission, the page number/line number reported may be changed due to copy editing and may not be referable in the published version. In this case, the section/paragraph may be used as an alternative reference.
